# Supplementary material for: Effect of therapeutic drug monitoring-based dose optimization of piperacillin/tazobactam on sepsis-related organ dysfunction in patients with sepsis: a randomized controlled trial
Source: Springer Nature journal article supplement (doi:10.1007/s00134-021-06609-6), 2022-02-01
Supplement: MOESM1 [file 20088590]

**Appendix**

**eTable 1** Screening and Enrollment by Site

| **Study site** | **City/country** | **Total patients screened** | **Total patients enrolled** |
| --- | --- | --- | --- |
| Jena University Hospital | Jena/Germany | 380 | 82 |
| Ulm University Hospital | Ulm/Germany | 51 | 49 |
| University Medical Center Hamburg-Eppendorf | Hamburg/Germany | 212 | 43 |
| Bielefeld Hospital | Bielefeld/Germany | 33 | 13 |
| University of Heidelberg | Heidelberg/Germany | 56 | 11 |
| University of Cologne | Cologne/Germany | 67 | 41 |
| Heidenheim Hospital | Heidenheim/Germany | 174 | 9 |
| Sindelfingen Hospital | Sindelfingen/Germany | 26 | 4 |
| University Hospital Würzburg | Würzburg/Germany | 2 | 2 |
| Mainz University Hospital | Mainz/Germany | 19 | 0 |
| Bad Berka Hospital | Bad Berka/Germany | 0 | 0 |
| Greifswald University Hospital | Greifswald/Germany | 0 | 0 |
| Berlin Charité | Berlin/Germany | 0 | 0 |

**eTable 2.** Piperacillin/Tazobactam (TZP) dosing instructions

| 1. **Dosing instructions for the experimental therapy arm** | | | |
| --- | --- | --- | --- |
| **Loading dose (LD)** | | Patients without TZP therapy within 24 h prior to randomization: 4.5 g TZP in 30 min  Patients with TZP therapy within 24 h prior to randomization: at the discretion of the physician (depending on when the last dose of TZP was administered) | |
| **Continuous infusion**  (Start after loading dose completion) | | eGFR ≥ 20 ml/min 13.5 g/24 h  eGFR < 20 ml/min 9 g/24 h | |
| **Dose adjustment**   - Start: day 1 after randomization (optional already on day of randomization) | | **MIC** | **Piperacillin target concentration* (mg/l)** |
| Unknown pathogen *or*  pathogen with MIC ≤ 16 mg/l | 80 [64-96] |
| Pathogen with MIC ≤ 8 mg/l | 40 [32-48] |
| Pathogen with MIC ≤ 4 mg/l | 20 [16-24] |
| 1. **Dosing instructions for the standard of care arm** | | | |
| **Loading dose (LD)** | Patients without TZP therapy within 24 h prior to randomization: 4.5 g TZP in 30 min  Patients with TZP therapy within 24 h prior to randomization: at the discretion of the physician (depending on when the last dose of TZP was administered) | | |
| **Continuous infusion**  (Start after loading dose completion) | eGFR ≥ 20 ml/min 13.5 g/24 h  eGFR < 20 ml/min 9 g/24 h | | |
| **Dose adjustment** | According to current renal function (eGFR) as measured with the Cockcroft-Gault formula or type of renal replacement therapy:   - eGFR ≥ 20 ml/min or CRRT or SLED: 13.5 g/24 h - eGFR < 20 ml/min or iHD: 9 g/24 h | | |

Abbreviations: IHD = intermittent hemodialysis; CRRT = continuous renal replacement therapy; SLED = sustained low-efficiency dialysis, MIC: minimal inhibitory concentration, eGFR = estimated glomerular filtration rate

* target piperacillin concentration = 4 x MIC/0.81 [+/- 20%]; with 0,81 = free fraction of piperacillin

**eTable 3**. Detected pathogens responsible for sepsis episodes

|  | **All patientsa**  **(n=253)** | **TDM**  **(n=126)** | **No-TDM**  **(n=127)** |
| --- | --- | --- | --- |
| **Gram-positive pathogen, No (%)** | | | |
| *Staphylococcus aureus,* Methicillin- susceptible | 34 (6.7) | 17 (6.2) | 17 (7.4) |
| *Staphylococcus aureus,* Methicillin- resistant | 1 (0.2) | 1 (0.4) | 0 |
| Coagulase-negative staphylococci Methicillin-susceptible | 26 (5.1) | 14 (5.1) | 12 (5.2) |
| Coagulase-negative staphylococci Methicillin-resistant | 6 (1.2) | 5 (1.8) | 1 (0.4) |
| *Streptococcus pneumoniae* | 3 (0.6) | 1 (0.4) | 2 (0.9) |
| *Enterococcus* faecalis | 31 (6.1) | 14 (5.1) | 17 (7.4) |
| *Enterococcus* faecium | 32 (6.3) | 18 (6.5) | 14 (6.1) |
| Other *Streptococcus* species | 33 (6.6) | 22 (8.0) | 11 (4.8) |
| Otherb | 18 (3.6) | 11 (4.0) | 7 (3.0) |
| **Gram-negative pathogen, No (%)** | | | |
| *Escherichia coli* | 86 (17.0) | 50 (18.2) | 36 (15.7) |
| *Klebsiella* species | 59 (11.7) | 30 (10.9) | 29 (12.6) |
| *Proteus* species | 25 (5.0) | 14 (5.1) | 11 (4.8) |
| *Enterobacter species* | 27 (5.3) | 14 (5.1) | 13 (5.7) |
| *Pseudomonas species* | 31 (6.1) | 18 (6.5) | 13 (5.7) |
| *Serratia species* | 8 (1.6) | 4 (1.5) | 4 (1.7) |
| *Citrobacter species* | 11 (2.2) | 8 (2.9) | 3 (1.3) |
| *Acinetobacter species* | 2 (0.4) | 1 (0.4) | 1 (0.4) |
| *Haemophilus species* | 3 (0.6) | 1 (0.4) | 2 (0.9) |
| *Stenotrophomonas maltophilia* | 12 (2.4) | 3 (1.1) | 9 (3.9) |
| Otherc | 26 (5.1) | 16 (5.8) | 10 (4.3) |
| **Fungi, No (%)** | | | |
| *Candida albicans* | 13 (2.6) | 7 (2.5) | 6 (2.6) |
| Other *Candida* species | 8 (1.6) | 2 (0.7) | 6 (2.6) |
| *Aspergillus* species | 3 (0.6) | 2 (0.7) | 1 (0.4) |
| Otherd | 6 (1.2) | 1 (0.4) | 5 (2.2) |
| **Other**e, **No (%)** | 1 (0.4) | 1 (0.4) | 0 |

a Multiple responses per patient possible

b Other includes other gram-positive bacteria (e.g., *Bacillus* species, *Corynebacterium* species, *Listeria species, Nocardia species*).

c Other includes other gram-negative bacteria (e.g., *Legionella*, *Moraxella*, *Neisseria*, *Salmonella*)

d Other includes *Phycomyces* species, *Coccidioides*, *Zygomyces*, *Rhizopus*, *Mucor*, and *Microsporum* species.

e Other includes *Mycobacteria species, Chlamydia species, Mycoplasma species*

**eTable 4**. Piperacillin/tazobactam minimal inhibitory concentrations (MICs, in mg/L) of the five most commonly detected gram-negative pathogens.

|  | **All patients**  **(No. of isolates, % of pathogen)** | **TDM**  **(No. of isolates, % of group)** | **No-TDM**  **(No. of isolates, % of group)** |
| --- | --- | --- | --- |
| *Escherichia coli (n=86)* | | | |
| MIC ≤ 4  MIC = 8-16  MIC > 16 | 69 (80.2)  3 (3.5)  14 (16.3) | 39 (78.0)  1 (2.0)  10 (20.0) | 30 (83.3)  2 (5.6)  4 (11.1) |
| *Klebsiella species (n=59)* |  |  |  |
| MIC ≤ 4  MIC = 8-16  MIC > 16 | 51 (86.4)  2 (3.4)  6 (10.2) | 27 (93.1)  1 (3.4)  1 (3.4) | 24 (80.0)  1 (3.3)  5 (16.7) |
| *Proteus* species (n=25) |  |  |  |
| MIC ≤ 4  MIC = 8-16  MIC > 16 | 24 (96.0)  0  1 (4.0) | 14 (100%)  0  0 | 10 (90.9)  0  1 (9.1) |
| *Enterobacter species (n=27)* |  |  |  |
| MIC ≤ 4  MIC = 8-16  MIC > 16 | 17 (63.0)  2 (7.4)  8 (29.6) | 9 (64.3)  2 (14.3)  3 (21.4) | 8 (61.5)  0  5 (38.5) |
| *Pseudomonas species (n=31)* |  |  |  |
| MIC ≤ 4  MIC = 8-16  MIC > 16 | 21 (67.7)  7 (22.6)  3 (9.7) | 13 (68.4)  3 (15.8)  3 (15.8) | 8 (66.7)  4 (33.3)  0 |

**eTable 5**. Frequency of piperacillin/tazobactam dose adjustments in patients receiving piperacillin/tazobactam up to day 10 after randomization. Number of patients with dose adjustment/overall number of patients with piperacillin/tazobactam therpapy (%).

| **Day** | **TDM**  **(n=126)** | **No-TDM**  **(n = 127)** |
| --- | --- | --- |
| Day 1 | 85/121 (70.2) | 8/125 (6.4) |
| Day 2 | 63/109 (57.8) | 10/110 (9.1) |
| Day 3 | 49/86 (57.0) | 7/95 (7.4) |
| Day 4 | 31/74 (41.9) | 5/80 (6.3) |
| Day 5 | 31/64 (48.4) | 1/66 (1.5) |
| Day 6 | 20/52 (38.5) | 2/56 (3.6) |
| Day 7 | 17/33 (51.5) | 0/34 (0) |
| Day 8 | 11/22 (50.0) | 0/18 (0) |
| Day 9 | 3/12 (25.0) | 0/11 (0) |
| Day 10 | 2/6 (33.3) | 0/5 (0) |
| **Overall** | **312/579 (53.9)** | **33/600 (6.3)** |

**eTable 6**. Frequency of an increase or decrease of piperacillin/tazobactam dose as a consequence of TDM in patients with TDM-guided therapy receiving piperacillin/tazobactam up to day 10 after randomization. Number of patients with increase (%), respectively decrease of piperacillin/tazobactam dose (%).

| **Day** | **Increase in dosage** | **Decrease in dosage** |
| --- | --- | --- |
| Day 1 | 39 (45.3) | 47 (54.7) |
| Day 2 | 30 (41.7) | 42 (58.3) |
| Day 3 | 25 (48.1) | 27 (51.9) |
| Day 4 | 16 (50.0) | 16 (50.0) |
| Day 5 | 13 (40.6) | 19 (59.4) |
| Day 6 | 15 (62.5) | 9 (37.5) |
| Day 7 | 11 (61.1) | 7 (38.9) |
| Day 8 | 6 (46.2) | 7 (53.8) |
| Day 9 | 2 (66.7) | 1 (33.3) |
| Day 10 | 1 (50.0) | 1 (50.0) |
| **Overall** | **51.2%** | **48.8%** |

**eTable 7**. Attainment of individual piperacillin target concentrations in patients with available data for concentrations on the given day, n (%).

| **Day** | **TDM** | **No-TDM** |
| --- | --- | --- |
| Day 1 |  |  |
| Below target | 32 (26.4) | 34 (28.1) |
| At target | 41 (33.9) | 23 (19.0) |
| Above Target | 48 (39.7) | 64 (52.9) |
| Day 2 |  |  |
| Below target | 14 (13.5) | 34 (31.5) |
| At target | 43 (41.3) | 17 (15.7) |
| Above Target | 47 (45.2) | 57 (52.8) |
| Day 3 |  |  |
| Below target | 23 (26.7) | 33 (36.7) |
| At target | 31 (36.0) | 11 (12.2) |
| Above Target | 32 (37.2) | 46 (51.1) |
| Day 4 |  |  |
| Below target | 18 (24.7) | 31 (40.3) |
| At target | 32 (43.8) | 12 (15.6) |
| Above Target | 23 (31.5) | 34 (44.2) |
| Day 5 |  |  |
| Below target | 15 (24.2) | 24 (37.5) |
| At target | 22 (35.5) | 8 (12.5) |
| Above Target | 25 (40.3) | 32 (50.0) |
| Day 6 |  |  |
| Below target | 24 (47.1) | 24 (43.6) |
| At target | 11 (21.6) | 2 (3.6) |
| Above Target | 16 (31.4) | 29 (52.7) |
| Day 7 |  |  |
| Below target | 8 (25.8) | 12 (36.4) |
| At target | 11 (35.5) | 5 (15.2) |
| Above Target | 12 (38.7) | 16 (48.5) |
| Day 8 |  |  |
| Below target | 2 (22.2) | 5 (27.8) |
| At target | 11 (44.4) | 4 (22.2) |
| Above Target | 7 (33.3) | 9 (50.0) |
| Day 9 |  |  |
| Below target | 3 (27.3) | 3 (30.0) |
| At target | 6 (54.5) | 2 (20.0) |
| Above Target | 2 (18.2) | 5 (50.0) |
| Day 10 |  |  |
| Below target | 1 (16.7) | 1 (25.0) |
| At target | 3 (50.0) | 1 (25.0) |
| Above Target | 2 (33.3) | 2 (50.0) |

**eTable 8.** Details of Serious Adverse Events (SAE).

| **Group** | **Details of SAE** | **Relationship to study drug** | **Alternative cause if not related** | **Outcome** |
| --- | --- | --- | --- | --- |
| TDM | Upper gastrointestinal bleeding, reflux esophagitis | Not associated | Stress ulcer | Resolved without sequelae |
| TDM | Small bowel perforation | Not associated | Ischemia | Fatal |
| TDM | Multiorgan failure | Not associated | Sepsis | Fatal |
| TDM | Multiorgan failure | Not associated | Sepsis | Fatal |
| TDM | C*. difficile* infection | Associated |  | Resolved without sequelae |
| TDM | Intestinal ischemia | Not associated | Sepsis | Resolved without sequelae |
| TDM | Hemothorax | Not associated | N/A | Resolved without sequelae |
| No-TDM | Respiratory insufficiency, pneumonia | Not associated | N/A | Resolved without sequelae |
| No-TDM | Subarachnoid hemorrhage | Not associated | N/A | Resolved without sequelae |
| No-TDM | Intracerebral hemorrhage | Not associated | N/A | Fatal |
| No-TDM | Severe epistaxis | Not associated | Coagulation disorder | Resolved without sequelae |
| No-TDM | Hypoxic brain injury | Not associated | N/A | Fatal |
| No-TDM | Electromechanical Decoupling | Not associated | N/A | Fatal |
| No-TDM | Intestinal ischemia | Not associated | Sepsis | Resolved with sequelae |
| No-TDM | Cholecystitis | Not associated | N/A | Resolved without sequelae |

**eFigure 1.** Mean SOFA score up to day 10.

**eFigure 2.** Total daily dose of piperacillin/tazobactam administered per study day in patients with TDM-guided therapy (TDM) or fixed dose (control). The median, interquartile range, and range are presented.


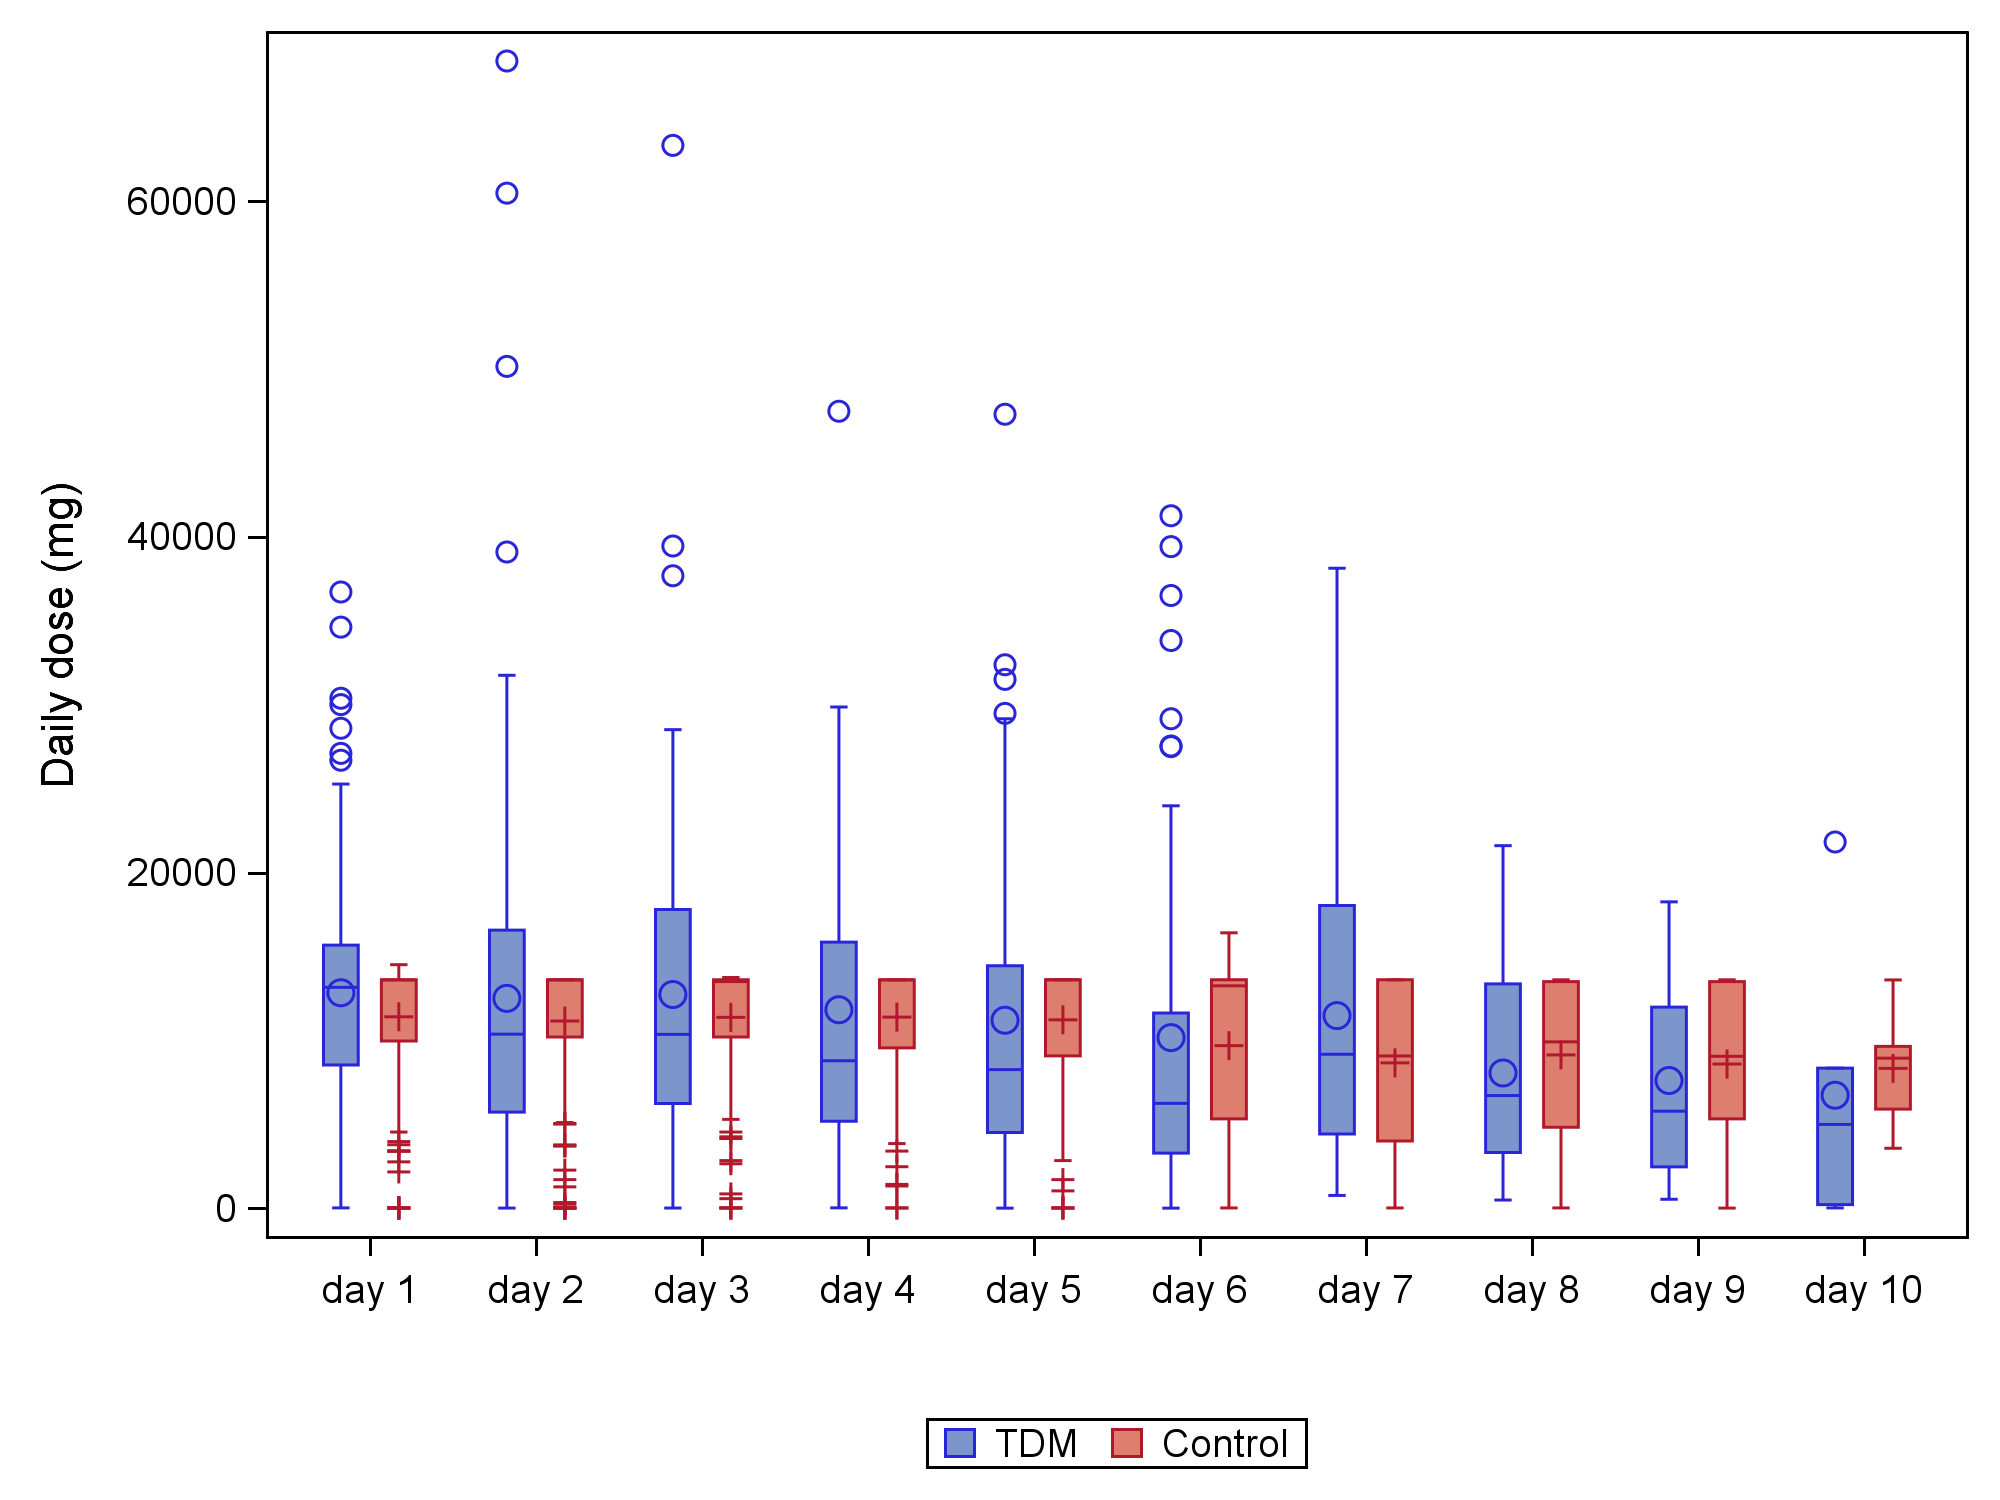


**eFigure 3**. Piperacillin concentrations (mg/L) measured up to day 10 in patients with TDM-guided therapy (TDM) or fixed dose (control) receiving piperacillin/tazobactam therapy. The median, interquartile range, and range are presented (+ / o outliers).


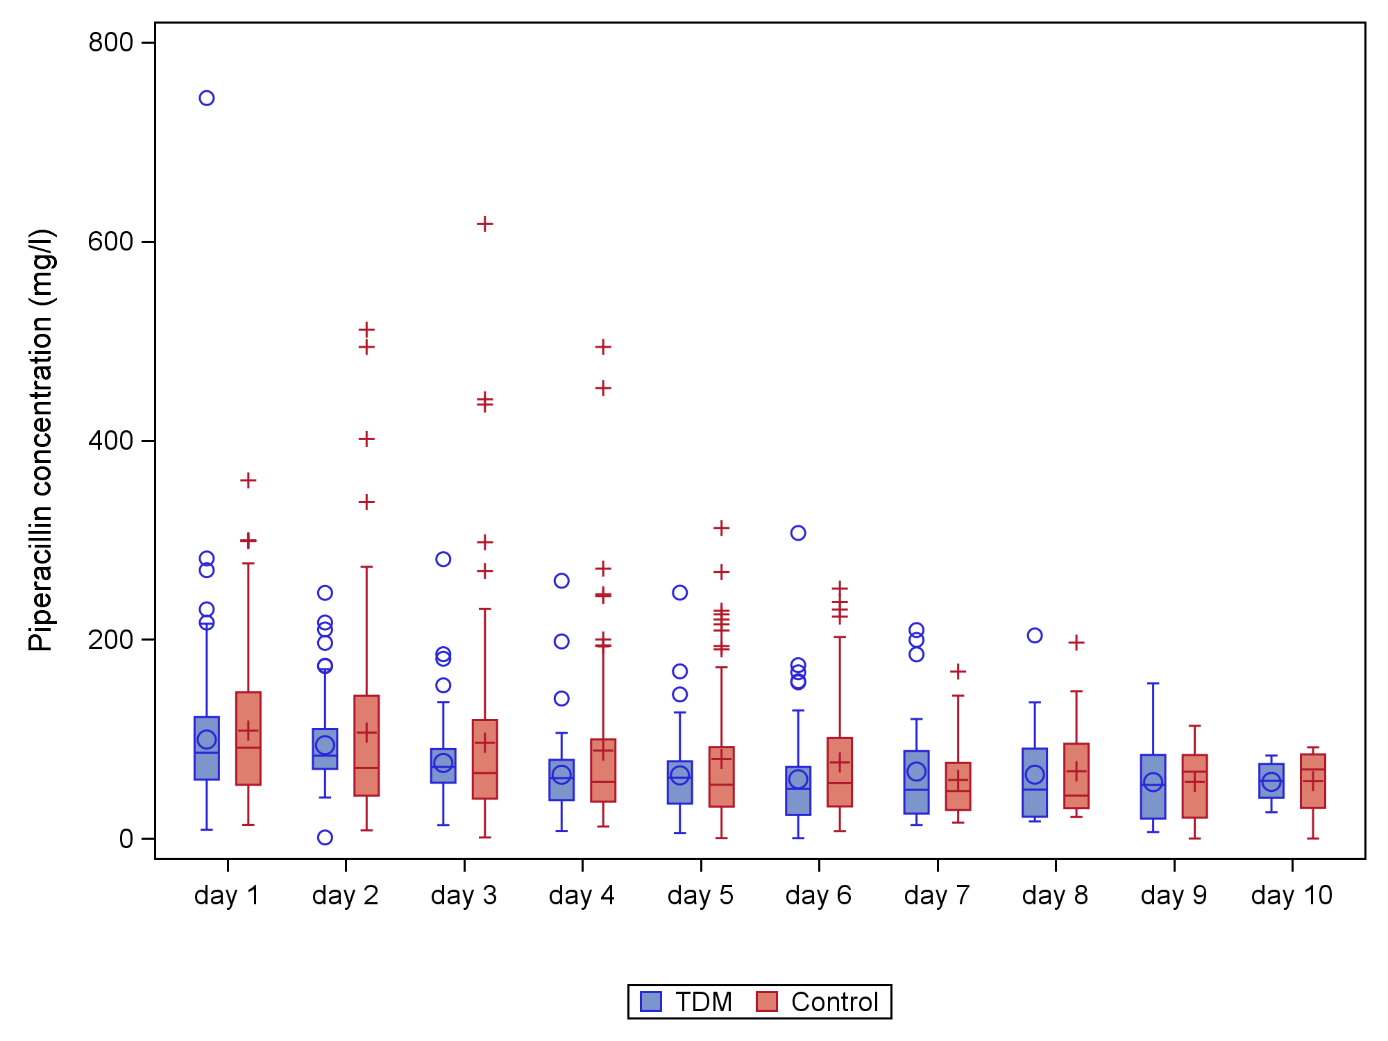


|  |  | Day 1 | Day 2 | Day 3 | Day 4 | Day 5 | Day 6 | Day 7 | Day 8 | Day 9 | Day 10 |
| --- | --- | --- | --- | --- | --- | --- | --- | --- | --- | --- | --- |
| Patients (n) | TDM | 121 | 104 | 86 | 73 | 62 | 51 | 31 | 20 | 11 | 6 |
| No-TDM | 121 | 108 | 90 | 77 | 64 | 55 | 33 | 18 | 10 | 4 |

**eFigure 4.** Piperacillin concentration (left y-axis, mg/L), subgroups of patients with corresponding piperacillin concentration (x-axis, box-plots (median, interquartile range, and range) and piperacillin clearance (ml/min, right y-axis, line) on day 1 after randomization and corresponding 28-day mortality (table, deceased/all patients in subgroup (%)).


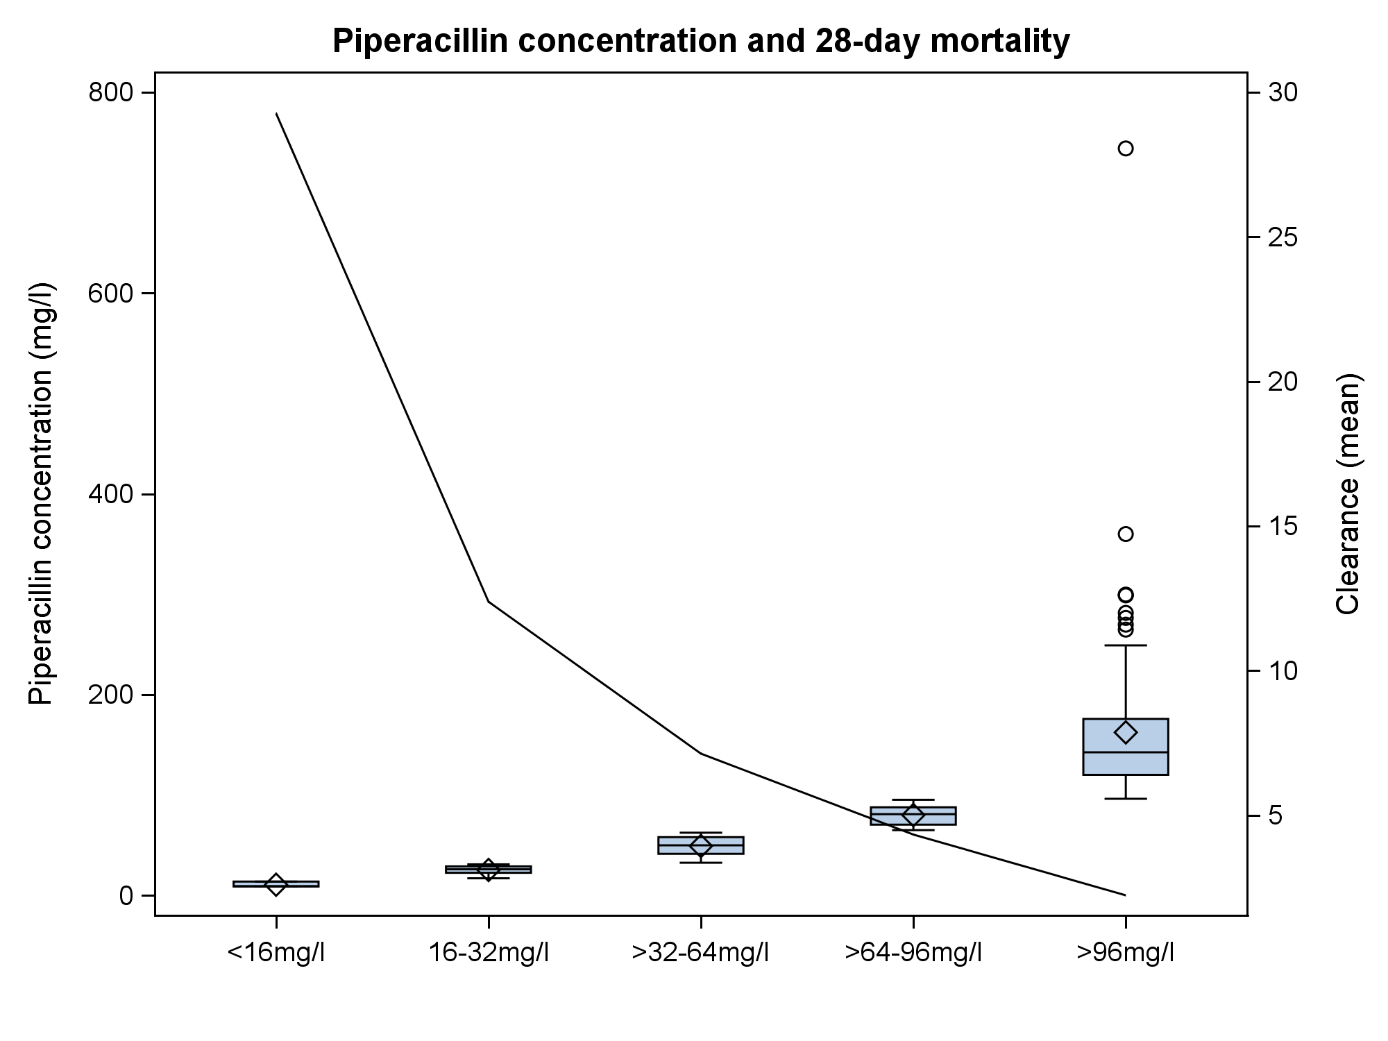


|  | < 16 mg/l | 16-32 mg/l | >32-64 mg/l | >64-96 mg/l | >96 mg/l |
| --- | --- | --- | --- | --- | --- |
| 28-day  mortality,  N (%) | 0/3 (0) | 4/23 (17.4) | 4/48 (8.3) | 12/61 (19.7) | 35/104 (33.7) |
